# Supplementary material
Source: HighWire-hosted journal article supplement (https://bmjopen.bmj.com/content/6/2/e009070)
Supplement: inline-supplementary-material-1 [file inline-supplementary-material-1.pdf]

## Annex 1 (Web extra) Database searches

### Embase

- 1 Huntington chorea/ (13436)
- 2 Huntington\* chorea.tw. (1216)
- 3 Huntington\* diseas\*.tw. (9586)
- 4 1 or 2 or 3 (15004)
- 5 incidence/ (169487)
- 6 incidence\*.tw. (496357)
- 7 5 or 6 (560558)
- 8 4 and 7 (160)

### Medline

- 1 Huntington Disease/ (8272)
- 2 (Huntingt\* adj2 (diseas\* or chorea\*)).tw. (9425)
- 3 or/1-2 (10898)
- 4 Incidence/ (148618)
- 5 Incidence\*.tw. (427236)
- 6 or/4-5 (497129)
- 7 3 and 6 (103)

**Annex 2 (web extra)**  
**Annual incidence rates of HD 1990-2010**

| <b>Year</b> | <b>Incident cases</b> | <b>Population at risk</b> | <b>Incidence (per million patient years)</b> | <b>Incidence (95% confidence intervals)</b> |
|-------------|-----------------------|---------------------------|----------------------------------------------|---------------------------------------------|
| 1990        | 1                     | 177,201                   | 5.64                                         | 0.14 to 31.44                               |
| 1991        | 9                     | 590,478                   | 15.24                                        | 7.00 to 28.93                               |
| 1992        | 2                     | 887,429                   | 2.25                                         | 0.27 to 8.14                                |
| 1993        | 4                     | 1,054,175                 | 3.79                                         | 1.03 to 9.72                                |
| 1994        | 16                    | 1,228,009                 | 13.03                                        | 7.45 to 8.14                                |
| 1995        | 10                    | 1,357,716                 | 7.37                                         | 3.5 to 13.54                                |
| 1996        | 14                    | 1,483,605                 | 9.44                                         | 5.16 to 21.16                               |
| 1997        | 13                    | 1,658,058                 | 7.84                                         | 4.17 to 13.41                               |
| 1998        | 11                    | 1,956,579                 | 5.62                                         | 2.81 to 10.06                               |
| 1999        | 16                    | 2,209,354                 | 7.24                                         | 4.14 to 11.76                               |
| 2000        | 21                    | 2,574,200                 | 8.16                                         | 5.05 to 12.47                               |
| 2001        | 26                    | 3,063,386                 | 8.49                                         | 5.54 to 12.44                               |
| 2002        | 22                    | 3,392,342                 | 6.49                                         | 4.06 to 9.82                                |
| 2003        | 29                    | 3,679,254                 | 7.88                                         | 5.28 to 11.32                               |
| 2004        | 33                    | 3,905,273                 | 8.45                                         | 5.82 to 11.87                               |
| 2005        | 34                    | 4,156,147                 | 8.18                                         | 5.67 to 11.43                               |
| 2006        | 28                    | 4,263,980                 | 6.57                                         | 4.36 to 9.49                                |
| 2007        | 31                    | 4,295,599                 | 7.22                                         | 4.91 to 10.24                               |
| 2008        | 19                    | 4,330,199                 | 4.39                                         | 2.64 to 6.85                                |
| 2009        | 23                    | 4,330,452                 | 5.31                                         | 3.37 to 7.97                                |
| 2010        | 31                    | 4,240,933                 | 7.31                                         | 4.97 to 10.38                               |

**Annex 3 (Web extra)  
Excluded studies**

| <b>Study ID</b>                | <b>Reason(s) for exclusion</b>                                                                                                                        |
|--------------------------------|-------------------------------------------------------------------------------------------------------------------------------------------------------|
| Adams 1988 <sup>w1</sup>       | Study of the age of onset of symptoms in a group of people with HD but no estimates of prevalence or incidence                                        |
| Aiyesimoju 1984 <sup>w2</sup>  | No population based numerator or denominator for the incidence or prevalence of HD                                                                    |
| Alonso 2009 <sup>w3</sup>      | No adequate data for incidence or prevalence to be estimated.                                                                                         |
| Avila-Giron 1973 <sup>w4</sup> | No denominator. No data on prevalence                                                                                                                 |
| Bayulkem 1961 <sup>w5</sup>    | Denominator is numbers of hospital admissions not population based.                                                                                   |
| Bell 1934 <sup>w6</sup>        | No estimate of incidence or prevalence of HD                                                                                                          |
| Brothers 1949 <sup>w7</sup>    | Description of HD in Tasmania indicating a common ancestor. No prevalence or incidence estimates.                                                     |
| Carter 1983 <sup>w8</sup>      | No estimates of incidence or prevalence of HD                                                                                                         |
| Cchutani 1957 <sup>w9</sup>    | Description of cases of HD in the Punjab but no estimates of incidence or prevalence of HD.                                                           |
| Cendrowski 1964 <sup>w10</sup> | No estimate of incidence or prevalence of HD                                                                                                          |
| Critchley 1934 <sup>w11</sup>  | Only hospitalised patients committed under Mental Health Act. No population denominator                                                               |
| Cruz-Croke 1994 <sup>w12</sup> | Appears to be a mixture of patients reported in the literature supplemented by own hospital data. We cant exclude the possibility of double counting. |
| Ekesterne 2005 <sup>w13</sup>  | Austrian study of mortality rates of people with HD but no incidence or prevalence or data.                                                           |
| Gatto 2009 <sup>w14</sup>      | No estimate of incidence or prevalence of HD                                                                                                          |
| Gatto 2010 <sup>w15</sup>      | No estimate of incidence or prevalence of HD.                                                                                                         |
| Ginter 1999 <sup>w16</sup>     | No specific estimate of numbers of HD patients and no estimate of incidence or prevalence                                                             |
| Harper 1981 <sup>w17</sup>     | No original data on incidence or prevalence of HD.                                                                                                    |
| Harvey 2003 <sup>w18</sup>     | HD patients confined to those aged <65 years with cognitive impairment. No population estimate.                                                       |
| Hecimovic 2002 <sup>w19</sup>  | Not a study of incidence                                                                                                                              |
| Hemminki 2006 <sup>w20</sup>   | Study of hospitalisation rates for HD but no population-based estimates of incidence or prevalence rates                                              |
| Hendricks 2009 <sup>w21</sup>  | Study of probabilities of inheriting expanded CAG repeat but no estimates of incidence or prevalence rates.                                           |
| Huifang 2010 <sup>w22</sup>    | Part review and part case-series. No prevalence data.                                                                                                 |

|                                 |                                                                                                                                         |
|---------------------------------|-----------------------------------------------------------------------------------------------------------------------------------------|
| Husquinet 1985 <sup>w23</sup>   | Uses data from psychiatric registers and expresses prevalence in relation to live births.                                               |
| Imaizumi 1993 <sup>w24</sup>    | Concerned solely with mortality rates based on death certification.                                                                     |
| Korenyi 1973 <sup>w25</sup>     | No incidence or prevalence estimates.                                                                                                   |
| Lacone 1999 <sup>w26</sup>      | Not an incidence or prevalence study                                                                                                    |
| Lawal 2009 <sup>w27</sup>       | No data relating to incidence or prevalence of HD                                                                                       |
| Loy 2010 <sup>w28</sup>         | No original data; an estimate of the likely increase based on “population structure” since McCusker 2000.                               |
| Marx 1973 <sup>w29</sup>        | Study of genetic fitness. No estimate of prevalence or incidence                                                                        |
| Mattsson 1985 <sup>w30</sup>    | No new data on incidence or prevalence from Mattsson 1974                                                                               |
| Minski 1938 <sup>w31</sup>      | No estimate of incidence or prevalence of HD.                                                                                           |
| Morrison 2010 <sup>w32</sup>    | Provides a prevalence estimate for 2001 and full details were published in Morrison 2011 but no estimates of incidence                  |
| Paradisi 2008 <sup>w33</sup>    | No estimate of incidence or prevalence of HD                                                                                            |
| Pavoni 1990 <sup>w34</sup>      | Duplicate of incidence and prevalence (1971-1987) estimates by Govoni 1988                                                              |
| Petrin 1997 <sup>w35</sup>      | No specific estimates of the incidence and prevalence of HD.                                                                            |
| Pramanik 2000 <sup>w36</sup>    | No estimate of prevalence or incidence of HD                                                                                            |
| Quarrell 2009 <sup>w37</sup>    | No original data on incidence or prevalence of HD                                                                                       |
| Raskin 2000 <sup>w38</sup>      | No incidence/prevalence estimates                                                                                                       |
| Rubinsztein 1994 <sup>w39</sup> | No original data on incidence or prevalence of HD                                                                                       |
| Saleem 2003 <sup>w40</sup>      | No original data on incidence or prevalence of HD                                                                                       |
| Scholefield 2007 <sup>w41</sup> | No original data on incidence or prevalence of HD                                                                                       |
| Shaw 1982 <sup>w42</sup>        | No original data on incidence or prevalence of HD                                                                                       |
| Siesling 1997 <sup>w43</sup>    | No estimate of the prevalence/incidence of HD                                                                                           |
| Singer 1962 <sup>w44</sup>      | Not a population study. No estimate of incidence or prevalence of HD                                                                    |
| Spillane 1937 <sup>w45</sup>    | No estimates of incidence or prevalence of HD                                                                                           |
| Squitieri 1994 <sup>w46</sup>   | No estimate of prevalence/incidence.                                                                                                    |
| Whittier 1973 <sup>w47</sup>    | No estimate of prevalence but enumeration of the number of living patients in one institution (n=7) plus others (n=6) in the community. |

**Annex 5 (Web extra)**  
**Further details of included studies**

| Study ID                       | Location               | Incidence year(s) | Ages studied   | Population size                                                                                              | Numbers of incident cases                                                               | Patient-years                                                                                                | Incidence per 1000,000 person-years (95%CI)                                                                                                                                                      | Age of onset          | Comments                                                                                               |
|--------------------------------|------------------------|-------------------|----------------|--------------------------------------------------------------------------------------------------------------|-----------------------------------------------------------------------------------------|--------------------------------------------------------------------------------------------------------------|--------------------------------------------------------------------------------------------------------------------------------------------------------------------------------------------------|-----------------------|--------------------------------------------------------------------------------------------------------|
| <b>Eastern Asia</b>            |                        |                   |                |                                                                                                              |                                                                                         |                                                                                                              |                                                                                                                                                                                                  |                       |                                                                                                        |
| Chen 1968 <sup>6</sup>         | Guam                   | 1960-1966         | All ages       | 37,975                                                                                                       | 0                                                                                       | 265,825                                                                                                      | 0.00 (0 to 13.9)                                                                                                                                                                                 | Not stated            |                                                                                                        |
| Chang 1994 <sup>28</sup>       | Hong Kong China        | 1984-1991         | All ages       | 5,440,000                                                                                                    | 20                                                                                      | 43,520,000                                                                                                   | 0.46 (0.28 to 0.71)*                                                                                                                                                                             | 37.6 (range 20 to 52) |                                                                                                        |
| Chen 2010 <sup>9</sup>         | Taiwan                 | 2000-2007         | All ages       | 2001 = 22.4m<br>2002 = 22.5m<br>2003 = 22.6m<br>2004 = 22.7m<br>2005 = 22.8m<br>2006 = 22.9m<br>2007 = 23.0m | 2001 = 11<br>2002 = 21<br>2003 = 27<br>2004 = 36<br>2005 = 31<br>2006 = 20<br>2007 = 19 | 2001 = 22.4m<br>2002 = 22.5m<br>2003 = 22.6m<br>2004 = 22.7m<br>2005 = 22.8m<br>2006 = 22.9m<br>2007 = 23.0m | 2001 = 0.5 (0.2 to 0.9)*<br>2002 = 0.9 (0.5 to 0.9)*<br>2003 = 1.0 (0.7 to 2.0)*<br>2004 = 2.0 (1.0 to 2.0)*<br>2005 = 1.0 (0.9 to 2.0)*<br>2006 = 0.8 (0.5 to 1.0)*<br>2007 = 0.8 (0.4 to 1.0)* | Not stated            | Also includes age specific rates                                                                       |
| <b>Australasia</b>             |                        |                   |                |                                                                                                              |                                                                                         |                                                                                                              |                                                                                                                                                                                                  |                       |                                                                                                        |
| McCusker 2000 <sup>29</sup>    | NSW Australia          | 1991 & 1996       | All ages       | 1991 = 5,732,031<br>1996 = 6,038,969                                                                         | 1991 = 26<br>1996 = 39                                                                  | 1991 = 5,732,031<br>1996 = 6,038,969                                                                         | 1991 = 4.5 (3.0 to 6.7)<br>1996 = 6.5 (4.6 to 8.8)                                                                                                                                               | 47.9 (SD 13.7)        |                                                                                                        |
| <b>Europe</b>                  |                        |                   |                |                                                                                                              |                                                                                         |                                                                                                              |                                                                                                                                                                                                  |                       |                                                                                                        |
| Palo 1987 <sup>7</sup>         | Finland                | 1980s             | All ages       | 4,900,000                                                                                                    | 2                                                                                       | 4,900,000                                                                                                    | 0.2 to 0.4 (0.02 to 1.3)*                                                                                                                                                                        | Not stated            | Number of incident HD cases by back extrapolation = 1 or 2 depending on which incidence estimate used! |
| Govoni 1988 <sup>27</sup>      | Ferrara, Italy         | 1971-1987         | All ages       | 377,006                                                                                                      | 1971-1975 = 3<br>1976-1980 = 1<br>1981-1987 = 3<br>1971-1987 = 7                        | 6,032,096                                                                                                    | 1971-1975 = 1.5 (0.3 to 4.4)<br>1976-1980 = 0.5 (0.01 to 2.8)<br>1981-1987 = 1.1 (0.2 to 3.2)<br>1971-1987 = 1.1 (0.4 to 2.3)                                                                    | Not stated            | Patient years calculated by back extrapolation.                                                        |
| Ramos-Arroy 2005 <sup>28</sup> | Navara & Basque, Spain | 1994-2002         | All ages       | 2,550,000                                                                                                    | 1994 to 2002 = 111                                                                      | 21,165,000                                                                                                   | 4.7 (4.5 to 6.3)*                                                                                                                                                                                | 43.7 (SD 15)          | Population estimate by back extrapolation My Cis (but need checking!)                                  |
| Mercy 2008 <sup>8</sup>        | Cambridge UK           | 2000-2006         | 45 to 64 years | 75,600                                                                                                       | 9                                                                                       | 453,600                                                                                                      | 8.0 (2.0 to 23)                                                                                                                                                                                  | Not stated            | Restricted age population                                                                              |

|                                 |                               |           |           |                                                                                        |                                                               |                                                                                                   |                                                                                                                  |                                   |                                                                                                                  |
|---------------------------------|-------------------------------|-----------|-----------|----------------------------------------------------------------------------------------|---------------------------------------------------------------|---------------------------------------------------------------------------------------------------|------------------------------------------------------------------------------------------------------------------|-----------------------------------|------------------------------------------------------------------------------------------------------------------|
| Sackley<br>2011 <sup>10</sup>   | United<br>Kingdom             | 2004-2008 | All ages  | 2004=2,840,202<br>2005=2,948,206<br>2006=2,977,044<br>2007=2,983,870<br>2008=2,964,386 | 2004 = 14<br>2005 = 23<br>2006 = 19<br>2007 = 15<br>2008 = 13 | 2004 = 2,840,202<br>2005 = 2,948, 206<br>2006 = 2,977,044<br>2007 = 2,983,870<br>2008 = 2,964,386 | 2004 = 7 (3 to 8)*<br>2005 = 7.8 (5.0 to 12)*<br>2006 = 6 (4 to 10)*<br>2007 = 5 (3 to 8)*<br>2008 = 4 (2 to 7)* | 48.3<br>(SD14.)                   | Not sure whether the age at<br>diagnosis relates to the incident<br>cases only or includes prevalent<br>ones too |
| Sveinsson<br>2012 <sup>11</sup> | Iceland                       | 1988-2007 | All ages  | 2007=311,114                                                                           | 8                                                             | 5,714,285                                                                                         | 1.4 (0.6 to 2.8)*                                                                                                | 51<br>(range 28-<br>68)           | Patient years calculated by back<br>extrapolation                                                                |
| Douglas<br>2013 <sup>12</sup>   | United<br>Kingdom             | 1990-2010 | <21 years | 1990 = 248,518<br>2010 =<br>1,167,683                                                  | 12                                                            | 17,142,857                                                                                        | 0.70 (0.36 to 1.22)                                                                                              | Median = 15<br>(range 5 to<br>20) |                                                                                                                  |
| Current<br>study                | United<br>Kingdom             | 1990-2010 | >20 years | 9,282,126                                                                              | 393                                                           | 54,907,468                                                                                        | 7.2 (6.5 to 7.9)                                                                                                 | 52 years<br>(SD 16)               | Also includes incidence estimates<br>by year 1990-2010                                                           |
| <b>North America</b>            |                               |           |           |                                                                                        |                                                               |                                                                                                   |                                                                                                                  |                                   |                                                                                                                  |
| Kokman<br>1994 <sup>30</sup>    | Minnesota<br>USA              | 1950-1989 | All ages  | 106,000                                                                                | 10                                                            | 4,134,000                                                                                         | Definite = 3.0 (1.0 to 5.0)<br>Def + prob = 5.0 (3.0 to 9.0)                                                     | Not stated                        | Patient years calculated by back<br>extrapolation.                                                               |
| Almqvist<br>2001 <sup>31</sup>  | British<br>Columbia<br>Canada | 1996-1999 | All ages  | 4,000,000                                                                              | 110                                                           | 16,058,394                                                                                        | 6.9 (5.7 to 8.3)*                                                                                                | 46.9<br>(SD 13.7)                 | Author states population is<br>"approx". Patient years calculated<br>by back extrapolation.                      |

**Annex 4 (As web extra)**  
**References to excluded studies**

- w1. Adams P, Falek A. Arnold J. Huntington disease in Georgia: age at onset. *American Journal of Human Genetics* 1988; 43: 695-704.
- w2. Aiyesimoju AB, Osuntokun BO, Badeemosi O, Adeuja AO. Hereditary neurodegenerative disorders in Nigerian Africans, *Neurology* 1984;34:361-362.
- w3. Alonso M.E., Ochoa A., Boll M.-C., Sosa A.L., Yescas P., Lopez M., Macias R., Familiar I., Rasmussen A. Clinical and genetic characteristics of Mexican Huntington's disease patients. *Movement Disorders* 2009; 24: 2012-2015.
- w4. Avila-Giron R. Medical and social aspects of Huntington's chorea in the state of Zulia. *Advances in Neurology* 1973; 1: 261-266
- w5. Bayulkem F, Turek I. Huntington's chorea in Turkey. *Psychiatry Quarterly* 1961; 35: 358-360.
- w6. Bell J. Nervous diseases and muscular dystrophies. Part 1: Huntington's Chorea, In; *Treasury of Human Inheritance*. London: Cambridge University press,1934;4:1-29.
- w7. Brothers CRD. The history and incidence of Huntington's disease in Tasmania. *Proc Roy Soc Aust Coll Phys* 1949; 4: 48-50.

- w8. Carter C, Evans KA, Baraitser M. Effect of genetic counselling on the prevalence of Huntington's chorea. *BMJ* 1983; 286: 281-283.
- w9. Cchutani PN. Huntington's chorea in India. *Journal of the Indian Medical Association* 1957; 29: 156-157.
- w10. Cendrowski W. Niektore dane o geografii lasawicy dziedzicznej. *Neur. Neurochir. Psychiat. Pol.* 1964;14:63-66.
- w11. Critchley M. Huntington's chorea and East Anglia. *Journal of State Medicine* 1934; 42: 575-587.
- w12. Cruz-Coke R, Moreno RS. Genetic epidemiology of single gene defects in Chile. *Journal of Medical Genetics* 1994; 31: 702-706.
- w13. Ekester E, Lebhart G. Long-term monitoring of the mortality trend of Huntington's disease in Austria. *European Journal of Epidemiology* 2005; 20: 169-172.
- w14. Gatto E.M., Parisi V.L., Persi G.G., Etcheverry J.L., Leiguarda F., Varela V. Huntington's disease in a cohort from Argentina. *Journal of Neurology*. Conference: 19th Meeting of the European Neurological Society Milan Italy. Conference Start: 20090620 Conference End: 20090624. Conference Publication: (var.pagings). 256 (pp S222), 2009.
- w15. Gatto E.M., Parisi V., Persi G.G., Etcheverry J.L., Leiguarda F., Lpez A.P., Varela V. Estimation of prevalence and molecular characteristics among Huntington's disease patients of Argentina. *Movement Disorders*. Conference: 14th International Congress of Parkinson's Disease and Movement Disorders Buenos Aires Argentina. Conference Start: 20100613 Conference End: 20100617.
- w16. Ginter EK. Epidemiology of hereditary disorders in Russia's populations. 1999
- w17. Harper PS. Tyler A. Smith S. Jones P. Newcombe RG. McBroom V. Decline in the predicted incidence of Huntington's chorea associated with systematic genetic counselling and family support. *Lancet*. 1981; 2: 411-3.



w18. Harvey RJ, Skelton-Robinson M, Rossor MN. The prevalence and causes of dementia in people under the age of 65 years. *Journal of Neurology Neurosurgery and Psychiatry* 2003; 74: 1206-1209.

w19. Hecimovic S., Klepac N., Vlastic J., Vojta A., Janko D., Skarpa-Prpic I., Canki-Klain N., Markovic D., Bozиков J., Relja M., Pavelic K. Genetic background of Huntington disease in Croatia: Molecular analysis of CAG, CCG, and Delta2642 (E2642del) polymorphisms. *Human Mutation* 2002; 20: 233.

w20. Hemminki K, Sundqvist K, Li X. Familial risks for main neurological diseases in siblings based on hospitalizations in Sweden. *Twin Research & Human Genetics* 2006; 9: 580-586.

w21. Hendricks AE. Latourelle JC. Lunetta KL. Cupples LA. Wheeler V. MacDonald ME. Gusella JF. Myers RH. Estimating the probability of de novo HD cases from transmissions of expanded penetrant CAG alleles in the Huntington disease gene from male carriers of high normal alleles (27-35 CAG). *American Journal of Medical Genetics. Part A.* 2009; 149A:1375-1381.

w22. Huifang S., Pei Z., Burgunder J.-M. Huntington's disease in China. *Journal of Neurology, Neurosurgery and Psychiatry.* Conference: European Huntington's Disease Network, EHDN Annual Meeting 2010 Prague Czech Republic. Conference Start: 20100903 Conference End: 20100905. Conference Publication: (var.pagings). 81 (pp A21), 2010.

w23. Husquinet H. Huntington's chorea, the Liege experience. *J Genet Hum* 1985; 33: 10-18.

w24. Imaizumi Y. Mortality rates for Huntington's disease in Japan, 1969-1972: geographical variations. In *Intractable Neurological Disorders, Human Genome Research and Society. Proceedings of the Third International Bioethics Seminar in Fukui, 19-21 November 1993*, pp 77-80.

w25. Korenyi CK, Whittier JR. The juvenile form of Huntington's chorea: its prevalence and other observations. *Advances in Neurology* 1973; 1: 237-243.

w26. Laccone F., Engel U., Holinski-Feder E., Weigell-Weber M., Marczinek K., Nolte D., Morris-Rosendahl D.J., Zuhlke C., Fuchs K., Weirich-Schwaiger H., Schluter G., Von Beust G., Vieira-Saecker A.M.M., Weber B.H.F., Riess O. DNA analysis of Huntington's disease: Five years of experience in Germany, Austria, and Switzerland. *Neurology* 1999; 53: 801-806.

- w27. Lawal O., Gbadebo A.E. Inadequate knowledge and awareness on Huntington's disease: The risk factors for increased Huntington's disease incidence in Nigeria. *Clinical Genetics*. Conference: 2009 World Congress on Huntington's Disease Vancouver, BC Canada. Conference Start: 20090912 Conference End: 20090915.
- w28. Loy C.T., Lownie A., McCusker E. Huntington's disease. *The Lancet*. 376 (9751) (pp 1463), 2010.
- w29. Marx RN. Huntington's chorea in Minnesota. *Advances in Neurology* 1973; 1: 237-243.
- w30. Mattsson B, Ottosson J-O. Huntington's sjukdom i uppdaterad register. *Lakartidningen* 1985; 82: 1177.
- w31. Minski L, Guttman E. Huntington's Chorea: a study of 34 families. *Journal of Mental Science* 1938; 84: 21-96.
- w32. Morrison P.J. Accurate prevalence and uptake of testing for Huntington's disease. *The Lancet Neurology*. 9 (12) (pp 1147), 2010.
- w33. Paradisi I, Hernandez A, Arias S. Huntington disease mutation in Venezuela: age of onset, haplotype analyses, and geographic aggregation. *Journal of Human Genetics* 2008; 53: 127-135.
- w34. Pavoni M., Granieri E., Govoni V., Pavoni V., Del Senno L., Mapelli G. Epidemiologic approach to Huntington's disease in Northern Italy (Ferrara area). *Neuroepidemiology* 1990; 9:306-314.
- w35. Petrin AN, Perepelov AV, Nurbaev SD, Balanovskaya EV, Sitnikov VF, Inzemtseva VS, Rudenskaya GE. Hereditary nervous system diseases in Mordovia. *Genetika* 1997; 33: 836-843.
- w36. Pramanik S., Basu P., Gangopadhaya P.K., Sinha K.K., Jha D.K., Sinha S., Das S.K., Maity B.K., Mukherjee S.C., Roychoudhuri S., Majumder P.P., Bhattacharyya N.P. Analysis of CAG and CCG repeats in Huntingtin gene among HD patients and normal populations of India. *European Journal of Human Genetics* 2000; 8: 678-682.

- w37. Quarrell O. Living with juvenile HD. *Clinical Genetics*. Conference: 2009 World Congress on Huntington's Disease Vancouver, BC Canada. Conference Start: 20090912 Conference End: 20090915. Conference Publication: (var.pagings). 76 (pp 3), 2009.
- w38. Raskin S., Allan N., Teive H.A., Cardoso F., Haddad M.S., Levi G., Boy R., Lerena Junior J., Sotomaior V.S., Janzen-Duck M., Jardim L.B., Fellander F.R., Andrade L.A. Huntington disease: DNA analysis in Brazilian population. *Arquivos de neuro-psiquiatria*. 2000; 58: 977-985.
- w39. Rubinsztein DC. Amos W. Leggo J. Goodburn S. Ramesar RS. Old J. Bontrop R. McMahon R. Barton DE. Ferguson-Smith MA. Mutational bias provides a model for the evolution of Huntington's disease and predicts a general increase in disease prevalence. *Nature Genetics* 1994; 7: 525-30,
- w40. Saleem Q., Roy S., Murgood U., Saxena R., Verma I.C., Anand A., Muthane U., Jain S., Brahmachari S.K. Molecular analysis of Huntington's disease and linked polymorphisms in the Indian population. *Acta Neurologica Scandinavica* 2003; 108: 281-286.
- w41. Scholefield J, Greenberg J.A common SNP haplotype provides molecular proof of a founder effect of Huntington disease linking two South African populations. *European Journal of Human Genetics* (2007) 15, 590 – 595
- w42. Shaw M., Caro A. The mutation rate to Huntington's chorea. *Journal of Medical Genetics*. 1982; 19: 161-167), 1982.
- w43. Siesling S., Vegter-Van Der Vlis M., Roos R.A.C. Juvenile Huntington disease in the Netherlands. *Pediatric Neurology* 1997; 17: 37-43.
- w44. Singer K. Huntington's disease in the Chinese. *BMJ* 1963;ii:1311-1312
- w45. Spillane J, Phillips R. Huntington's chorea in South Wales. *Quarterly Journal of Medicine* 1937; 24: 403-423
- w46. Squitieri F., Andrew S.E., Goldberg Y.P., Kremer B., Spence N., Zeisler J., Nichol K., Theilmann J., Greenberg J., Goto J., Kanazawa I., Vesa J., Peltonen L., Almqvist E., Anvret M., Telenius H., Lin B., Napolitano G., Morgan K., Hayden M.R. DNA

haplotype analysis of Huntington disease reveals clues to the origins and mechanisms of CAG expansion and reasons for geographic variations of prevalence. *Human Molecular Genetics* 1994; 3: 2103-2114.

w47. Whittier J.R., Korenyi C., Sutanto D. Prevalence of Huntington chorea. *JAMA* 1973; 226: 1465-1466.
